# Supplementary material
Source: PubMed Central journal article supplement (PMC6233089)
Supplement: pnas.1721165115.sapp.pdf [file pnas.1721165115.sapp.pdf]

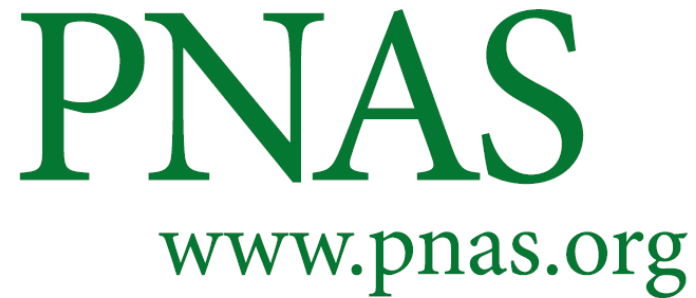

## Supplementary Information for

Towards a Psychology of Homo Sapiens: How to make psychological science less WEIRD and more representative.

Mostafa Salari Rad  
Alison Jane Martingano  
Jeremy Ginges

Jeremy Ginges  
Email: [gingesj@newschool.edu](mailto:gingesj@newschool.edu)

**This PDF file includes:**  
Tables 1 and 2

**Table S1. Demographics of samples published in Psychological Science in 2014.**

|                    |                | Total     | USA       | Europe   | Asia     | South America | Africa  | Israel    | Non-US English Speaking | Unknown  |
|--------------------|----------------|-----------|-----------|----------|----------|---------------|---------|-----------|-------------------------|----------|
| Number of Studies  |                | 447       | 227       | 70       | 17       | 3             | 6       | 20        | 53                      | 51       |
| Median Sample Size |                | 78        | 80        | 40       | 85       | 81            | 102     | 48        | 60                      | 166      |
| Mean Age           |                | 22.99     | 24.8      | 20.9     | 17.9     | 39.4          | 28.3    | 26.0      | 22.5                    | 30.6     |
| Gender             | Multi-gender   | 318 (71%) | 173 (76%) | 45 (64%) | 13 (76%) | 3 (100%)      | 3 (50%) | 7 (35%)   | 40 (75%)                | 34 (67%) |
|                    | Single-gender  | 18 (4%)   | 7 (3%)    | 1 (1%)   | 0        | 0             | 0       | 7 (35%)   | 0                       | 3 (6%)   |
|                    | Unreported     | 111 (25%) | 47 (21%)  | 24 (34%) | 4 (24%)  | 0             | 3 (50%) | 6 (30%)   | 13 (25%)                | 14 (27%) |
| Race/Ethnicity     | Majority White | 57 (13%)  | 39 (17%)  | 2 (3%)   | 1 (6%)   | 0             | 0       | 0         | 10 (19%)                | 5 (10%)  |
|                    | Minority White | 31 (7%)   | 11 (5%)   | 6 (9%)   | 2 (12%)  | 1 (33%)       | 5 (83%) | 2 (10%)   | 3 (6%)                  | 1 (2%)   |
|                    | Unreported     | 359 (80%) | 177 (78%) | 62 (89%) | 14 (82%) | 2 (67%)       | 1 (17%) | 18 (90%)  | 40 (75%)                | 45 (88%) |
| SES                | Reported       | 34 (8%)   | 19 (8%)   | 3 (4%)   | 1 (6%)   | 3 (100%)      | 1 (17%) | 0         | 4 (8%)                  | 3 (6%)   |
|                    | Unreported     | 413 (92%) | 208 (92%) | 67 (96%) | 16 (94%) | 0             | 5 (83%) | 20 (100%) | 49 (92%)                | 48 (94%) |
| Education          | University     | 157 (35%) | 18 (8%)   | 1 (1%)   | 0        | 0             | 2 (33%) | 0         | 2 (4%)                  | 2 (4%)   |
|                    | Children       | 25 (56%)  | 25 (11%)  | 11 (16%) | 3 (18%)  | 2 (67%)       | 0       | 0         | 9 (17%)                 | 0        |
|                    | Other          | 50 (11%)  | 89 (39%)  | 27 (39%) | 6 (35%)  | 0             | 3 (50%) | 17 (85%)  | 12 (23%)                | 3 (6%)   |
|                    | Unreported     | 215 (48%) | 95 (42%)  | 31 (44%) | 8 (47%)  | 1 (33%)       | 1 (17%) | 3 (15%)   | 30 (57%)                | 46 (90%) |

|              |                |              |              |             |             |             |              |             |             |             |
|--------------|----------------|--------------|--------------|-------------|-------------|-------------|--------------|-------------|-------------|-------------|
| Procedure    | Offline        | 87<br>(19%)  | 37<br>(16%)  | 3<br>(4%)   | 0           | 0           | 0            | 3<br>(15%)  | 6<br>(11%)  | 38<br>(75%) |
|              | Online         | 358<br>(80%) | 190<br>(84%) | 67<br>(96%) | 3<br>(100%) | 6<br>(100%) | 17<br>(100%) | 17<br>(85%) | 47<br>(89%) | 11<br>(22%) |
|              | Unreported     | 2<br>(1%)    | 0            | 0           | 0           | 0           | 0            | 0           | 0           | 2<br>(4%)   |
| Compensation | Fixed Fee      | 94<br>(21%)  | 2<br>(1%)    | 1<br>(1%)   | 0           | 0           | 1<br>(17%)   | 0           | 1<br>(2%)   | 2<br>(4%)   |
|              | Course Credit  | 7<br>(15%)   | 46<br>(20%)  | 11<br>(16%) | 8<br>(47%)  | 0           | 0            | 2<br>(10%)  | 7<br>(13%)  | 20<br>(39%) |
|              | Other/Multiple | 45<br>(10%)  | 32<br>(14%)  | 4<br>(6%)   | 1<br>(6%)   | 0           | 0            | 12<br>(60%) | 7<br>(13%)  | 8<br>(16%)  |
|              | Raffle         | 1<br>(1%)    | 34<br>(15%)  | 5<br>(7%)   | 0           | 0           | 0            | 4<br>(20%)  | 2<br>(4%)   | 0           |
|              | None           | 64<br>(14%)  | 0            | 1<br>(1%)   | 0           | 0           | 0            | 0           | 0           | 0           |
|              | Unreported     | 236<br>(52%) | 113<br>(50%) | 48<br>(69%) | 8<br>(47%)  | 3<br>(100%) | 5<br>(83%)   | 2<br>(10%)  | 36<br>(68%) | 21<br>(41%) |

**Table S2. Discussion of sample diversity in various sections of articles in Psychological Science, 2014.**

|                       |               | Total        | USA          | Europe      | Asia        | South America | Africa     | Israel      | Non-US English Speaking | Unknown     |
|-----------------------|---------------|--------------|--------------|-------------|-------------|---------------|------------|-------------|-------------------------|-------------|
| Number of Studies     |               | 447          | 227          | 70          | 17          | 3             | 6          | 20          | 53                      | 51          |
| Abstract              | Demographics  | 35<br>(8%)   | 21<br>(9%)   | 6<br>(9%)   | 1<br>(6%)   | 0             | 5<br>(83%) | 0           | 2<br>(4%)               | 0           |
|                       | Some          | 87<br>(19%)  | 19<br>(19%)  | 14<br>(20%) | 8<br>(47%)  | 3<br>(100%)   | 0          | 3<br>(15%)  | 14<br>(26%)             | 2<br>(4%)   |
|                       | None          | 325<br>(73%) | 163<br>(72%) | 50<br>(71%) | 8<br>(47%)  | 0             | 1<br>(17%) | 17<br>(85%) | 37<br>(70%)             | 49<br>(96%) |
| Conclusion            | Generalized   | 342<br>(76%) | 175<br>(77%) | 51<br>(73%) | 9<br>(53%)  | 3<br>(100%)   | 1<br>(17%) | 15<br>(75%) | 41<br>(77%)             | 47<br>(92%) |
|                       | Limited       | 105<br>(24%) | 52<br>(23%)  | 19<br>(27%) | 8<br>(47%)  | 0             | 5<br>(83%) | 5<br>(25%)  | 12<br>(23%)             | 4<br>(8%)   |
| Analysis of Diversity | Examined      | 78<br>(17%)  | 40<br>(18%)  | 11<br>(16%) | 6<br>(35%)  | 1<br>(33%)    | 5<br>(83%) | 2<br>(10%)  | 8<br>(15%)              | 5<br>(10%)  |
|                       | Not Examined  | 369<br>(83%) | 187<br>(82%) | 59<br>(84%) | 11<br>(65%) | 2<br>(67%)    | 1<br>(17%) | 18<br>(90%) | 45<br>(85%)             | 46<br>(90%) |
| Discussing Limitation | Pro-forma     | 14<br>(3%)   | 8<br>(3%)    | 1<br>(1%)   | 0           | 0             | 0          | 3<br>(15%)  | 2<br>(4%)               | 0           |
|                       | Detailed      | 51<br>(11%)  | 24<br>(11%)  | 10<br>(14%) | 3<br>(18%)  | 0             | 2<br>(33%) | 0           | 11<br>(21%)             | 1<br>(2%)   |
|                       | Absent        | 382<br>(86%) | 195<br>(86%) | 59<br>(84%) | 14<br>(82%) | 3<br>(100%)   | 4<br>(67%) | 17<br>(85%) | 40<br>(75%)             | 50<br>(98%) |
| Further experiments   | Mentioned     | 71<br>(16%)  | 32<br>(14%)  | 11<br>(16%) | 7<br>(41%)  | 0             | 2<br>(33%) | 3<br>(15%)  | 12<br>(23%)             | 4<br>(8%)   |
|                       | Not Discussed | 376<br>(84%) | 195<br>(86%) | 59<br>(84%) | 10<br>(59%) | 3<br>(100%)   | 4<br>(67%) | 17<br>(85%) | 41<br>(77%)             | 47<br>(92%) |
